# Supplementary material for: Selecting electrode materials for monolayer ReS2 with an Ohmic contact
Source: Royal Society of Chemistry journal article supplement (doi:10.1039/c8tc02116c), 2018-01-01
Supplement: c8tc02116c1.pdf [file c8tc02116c1.pdf]

## Supporting Information

### Selecting electrode materials for monolayer ReS<sub>2</sub> with Ohmic contact

Nan Gao, Si Zhou<sup>\*</sup>, Nanshu Liu, Yizhen Bai, Jijun Zhao<sup>\*</sup>

*Key Laboratory of Materials Modification by Laser, Ion and Electron Beams (Dalian University of Technology), Ministry of Education, Dalian 116024, China*

---

<sup>\*</sup> Corresponding authors. Email: sizhou@dlut.edu.cn (S. Zhou), zhaojj@dlut.edu.cn (J. Zhao).

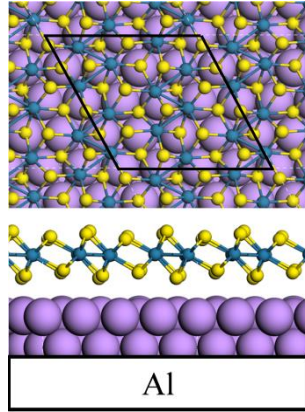

**Fig. S1** Top and side views of monolayer ReSe<sub>2</sub> on the Al(111) surface. The Al, S and Re atoms are shown in purple, yellow and turquoise colors, respectively. The black box indicates the lateral dimension of supercell.

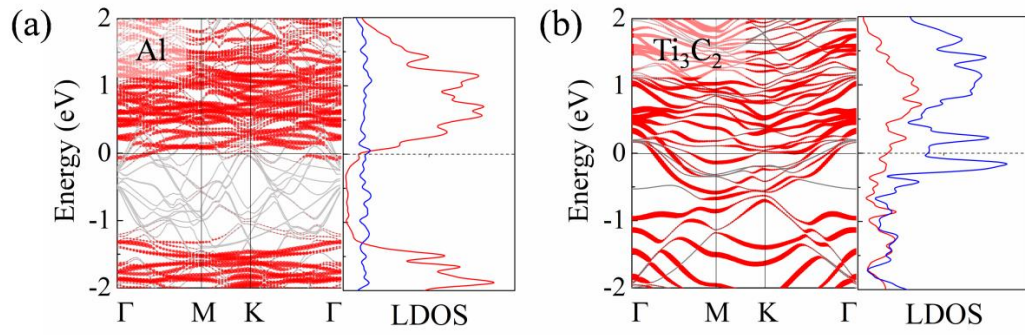

**Fig. S2** Left panels: electronic band structures (grey lines) of monolayer  $\text{ReS}_2$  on (a)  $\text{Al}(111)$  surface and (b)  $\text{Ti}_3\text{C}_2$  MXene. The red lines show the bands from the  $\text{ReS}_2$  sheet, and the weight is represented by the line width. Right panels: local density of states (LDOS) from  $\text{ReS}_2$  (red lines) and electrode material (blue lines). The Fermi energy is shifted to zero.

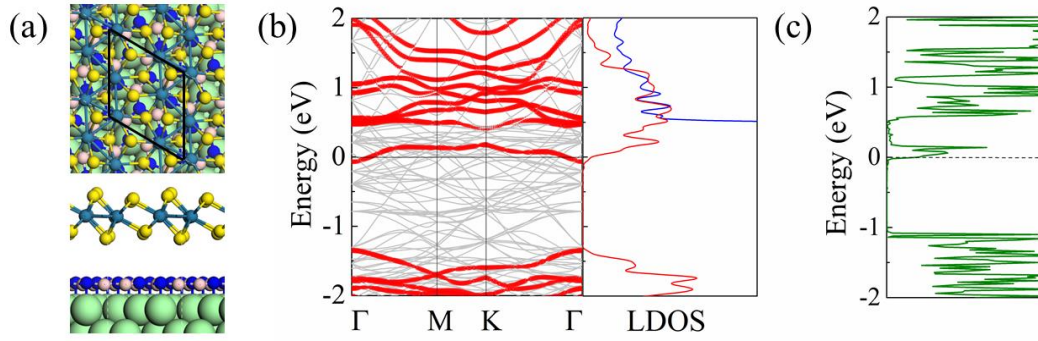

**Fig. S3** (a) Top and side views of monolayer ReSe<sub>2</sub> on Co/h-BN electrode. The B, N, Co, Se and Re atoms are shown in salmon, blue, green, yellow and turquoise colors, respectively. The black boxes in the top views indicate the lateral dimension of supercell. (b) Left panels: electronic band structures (grey lines) of monolayer ReSe<sub>2</sub> on Co/h-BN electrode. The red lines show the bands from the ReSe<sub>2</sub> sheet, and the weight is represented by the line width. Right panels: local density of states (LDOS) from ReSe<sub>2</sub> (red lines) and electrode material (blue lines). The Fermi energy is shifted to zero. (c) Transmission spectrum at zero bias voltage for the ReSe<sub>2</sub> FETs with Co/h-BN electrode. The Fermi energy is shifted to zero. The ReSe<sub>2</sub> sheet shows weak coupling with Co/h-BN, having interlayer spacing of 3.39 Å. The band structure and transmission spectrum retain the semiconducting feature of ReSe<sub>2</sub> monolayer with band gap and transport gap of 1.24 and 1.04 eV, respectively; both show *n*-type doping character, yielding zero Schottky barriers for electron carriers in the vertical and lateral directions.
